# Supplementary material
Source: HighWire-hosted journal article supplement (http://dmd.aspetjournals.org/highwire/filestream/78403/field_highwire_adjunct_files/0/849_supp_data.pdf)
Supplement: 849_supp_data.pdf [file 849_supp_data.pdf]

**SUPPLEMENTARY INFORMATION**

**Is the Protein-Mediated Uptake Of Drugs By OATPs A Real Phenomenon Or An Artifact?**

Mengyue Yin, Flavia Storelli and Jashvant D. Unadkat

Department of Pharmaceutics, University of Washington, Seattle, Washington (MY, FS and JDU)

**Supplementary Figures**

**Supplementary Fig. 1. The statin uptake-time profiles for OATP1B1\_RIF cells.** The increase in the slope of the uptake curves in the presence of HSA *vs.* HBSS suggests a PMUE on the passive uptake of the statins. The increased intercept in the presence of HSA suggests NSB of statin-HSA complex to the cells/labware. Data shown are mean  $\pm$  standard deviation (SD) of statin uptake (normalized to 1  $\mu$ M unbound concentration) and are representative of three independent experiments, each conducted in triplicate at each time point.

**Supplementary Fig. 2. Comparison of the amount of statin non-specifically bound to the cells (as statin-HSA complex; pink bars) and the increase in statin taken up by OATP1B1\_RIF cells in the presence of 5% HSA *vs.* HBSS (green bars).** The increase in the uptake of ATV, FLV, PTV and RSV in the presence of 5% HSA (*vs.* HBSS) can be completely explained by the NSB of the stain-HSA complex to the OATP1B1\_RIF cells. However, this was not the case for CRV. The uptake data shown have been corrected for small differences in unbound concentration and total protein content between each experiment. Data shown are mean  $\pm$  SD of three independent experiments, each conducted in triplicate. Statistical comparison between the increase in statin uptake in the presence of 5% HSA and NSB was performed using the Student's t test (\*  $p < 0.05$ ; \*\*  $p < 0.01$ ).

Supplementary Fig. 1.

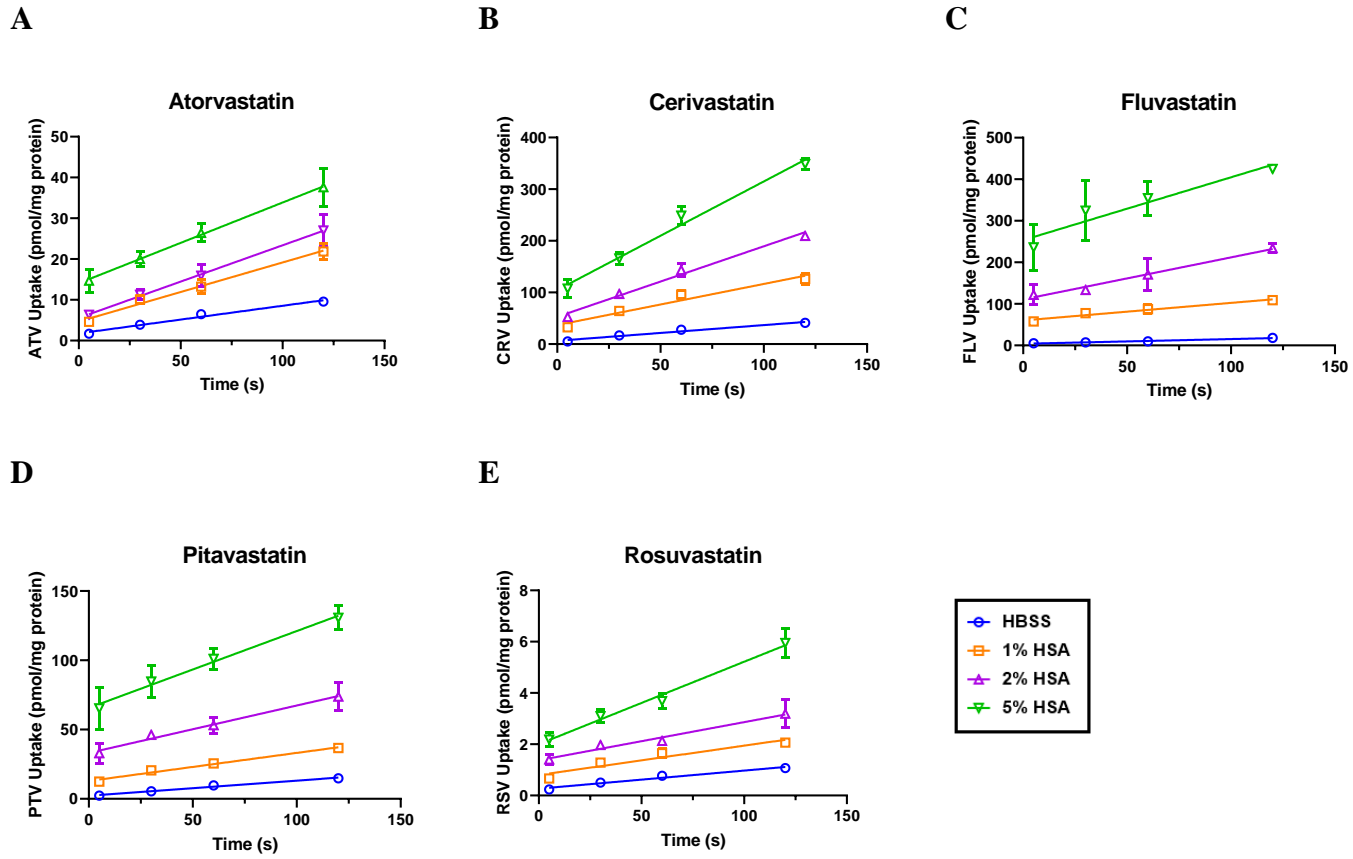

Supplementary Fig. 2.

A

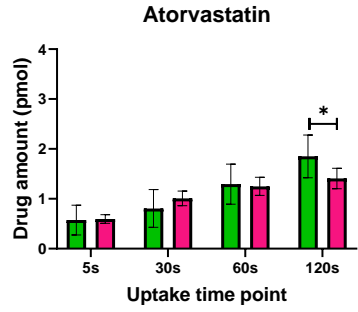

B

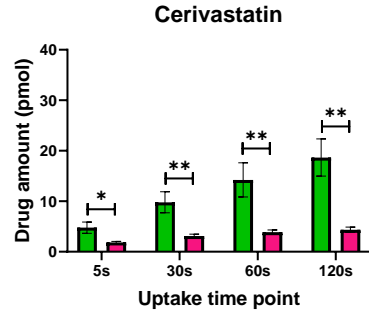

C

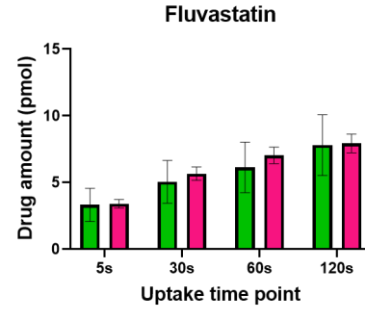

D

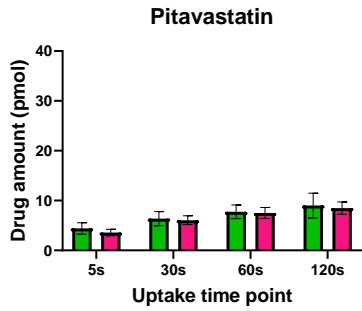

E

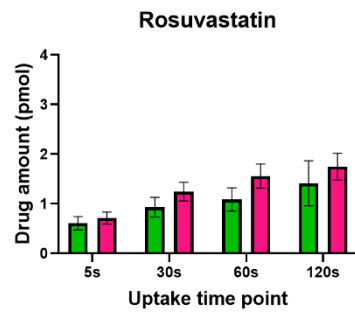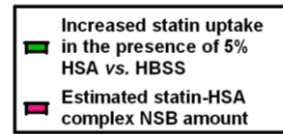

**Supplementary Tables****Supplementary Table. 1 LC-MS/MS conditions****LC method for quantification of the 5 statins**

| Time    | Flow Rate | %A | %B |
|---------|-----------|----|----|
| Initial | 0.5       | 90 | 10 |
| 0.5     | 0.5       | 90 | 10 |
| 0.7     | 0.5       | 5  | 95 |
| 2.2     | 0.5       | 5  | 95 |
| 2.3     | 0.5       | 90 | 10 |
| 3       | 0.5       | 90 | 10 |

A: 0.1% formic acid in water; B: 0.1% formic acid in acetonitrile

**MS conditions for quantification of the 5 statins**

| Compound ID     | ESI Mode | Q1 Mass (Da) | Q3 Mass (Da) | DP (volts) | CE (volts) | CXP (volts) |
|-----------------|----------|--------------|--------------|------------|------------|-------------|
| Atorvastatin    | Positive | 559          | 250.1        | 60         | 60         | 10          |
| Cerivastatin    | Positive | 460.3        | 356.3        | 100        | 40         | 10          |
| Fluvastatin     | Positive | 412          | 224.3        | 60         | 41         | 15          |
| Pitavastatin    | Positive | 422.2        | 290.2        | 90         | 35         | 17          |
| Rosuvastatin    | Positive | 482.3        | 258.2        | 80         | 30         | 10          |
| Diclofenac (IS) | Positive | 295.82       | 213.9        | 40         | 45         | 9           |

ESI, electrospray ionization; DP, declustering potential, CE, collision energy; CXP, collision cell exit potential.

**LC method for quantification of HSA and Na<sup>+</sup>K<sup>+</sup>ATPase**

| Time | Flow Rate | %A | %B |
|------|-----------|----|----|
|------|-----------|----|----|

|         |     |      |      |
|---------|-----|------|------|
| Initial | 0.3 | 97.0 | 3.0  |
| 3.00    | 0.3 | 97.0 | 3.0  |
| 10.00   | 0.3 | 87.0 | 13.0 |
| 20.00   | 0.3 | 75.0 | 25.0 |
| 22.00   | 0.3 | 66.7 | 33.3 |
| 22.90   | 0.3 | 50.0 | 50.0 |
| 23.00   | 0.3 | 20.0 | 80.0 |
| 24.10   | 0.3 | 20.0 | 80.0 |
| 24.20   | 0.3 | 97.0 | 3.0  |
| 28.00   | 0.3 | 97.0 | 3.0  |

A: 0.1% formic acid in water; B: 0.1% formic acid in acetonitrile

### MS conditions for quantification of HSA and Na<sup>+</sup>K<sup>+</sup>ATPase

| Compound ID                                 | Peptide Sequence                 | ESI Mode | Q1 Mass (Da) | Q3 Mass (Da) | DP (volts) | CE (volts) | CXP (volts) |
|---------------------------------------------|----------------------------------|----------|--------------|--------------|------------|------------|-------------|
| HSA F1                                      | VFDEFKPLVEEPQNLIK<br>(unlabeled) | Positive | 682.65       | 712.65       | 170        | 45         | 12          |
| HSA F2                                      |                                  | Positive | 682.65       | 970.75       | 170        | 45         | 12          |
| HSA IS F1                                   | VFDEFKPLVEEPQNLIK<br>(labeled)   | Positive | 685.35       | 712.65       | 170        | 45         | 12          |
| HSA IS F2                                   |                                  | Positive | 685.35       | 978.75       | 170        | 45         | 12          |
| Na <sup>+</sup> K <sup>+</sup> ATPase F1    | AAVPDAVGK<br>(labeled)           | Positive | 414.235      | 685.388      | 61.3       | 18         | 12          |
| Na <sup>+</sup> K <sup>+</sup> ATPase F2    |                                  | Positive | 414.235      | 586.320      | 61.3       | 18         | 12          |
| Na <sup>+</sup> K <sup>+</sup> ATPase IS F1 |                                  | Positive | 418.242      | 693.402      | 61.3       | 18         | 12          |
| Na <sup>+</sup> K <sup>+</sup> ATPase IS F2 |                                  | Positive | 418.242      | 594.334      | 61.3       | 18         | 12          |

ESI, electrospray ionization; DP, declustering potential, CE, collision energy; CXP, collision cell exit potential; F1/2, fragment 1/2. **Bolded letters** indicate the labeled amino acids.

**Supplementary Table. 2 In vitro apparent hepatic uptake intrinsic clearance of the 5 statins into OATP1B1-expressing or MOCK cells for the HBSS and HSA (1%, 2% and 5%) conditions**

| Drug         | HBSS                                                                       |                                                                       |             |                                                                       | 1% HSA      |                                                                            |                                                                       |             | 2% HSA                                                                |             |                                                                            |                                                                       | 5% HSA          |                                                                       |             |                 |                |                 |       |       |
|--------------|----------------------------------------------------------------------------|-----------------------------------------------------------------------|-------------|-----------------------------------------------------------------------|-------------|----------------------------------------------------------------------------|-----------------------------------------------------------------------|-------------|-----------------------------------------------------------------------|-------------|----------------------------------------------------------------------------|-----------------------------------------------------------------------|-----------------|-----------------------------------------------------------------------|-------------|-----------------|----------------|-----------------|-------|-------|
|              | CL <sub>int,tota</sub> <sup>#</sup><br>( $\mu$ /min/<br>mg<br>protein<br>) | CL <sub>int,passive</sub> <sup>%</sup><br>( $\mu$ /min/mg<br>protein) |             | CL <sub>int,OATP1B1</sub> <sup>*</sup><br>( $\mu$ /min/mg<br>protein) |             | CL <sub>int,tota</sub> <sup>#</sup><br>( $\mu$ /min/<br>mg<br>protein<br>) | CL <sub>int,passive</sub> <sup>%</sup><br>( $\mu$ /min/mg<br>protein) |             | CL <sub>int,OATP1B1</sub> <sup>*</sup><br>( $\mu$ /min/mg<br>protein) |             | CL <sub>int,tota</sub> <sup>#</sup><br>( $\mu$ /min/<br>mg<br>protein<br>) | CL <sub>int,passive</sub> <sup>%</sup><br>( $\mu$ /min/mg<br>protein) |                 | CL <sub>int,OATP1B1</sub> <sup>*</sup><br>( $\mu$ /min/mg<br>protein) |             |                 |                |                 |       |       |
|              |                                                                            | Based on passive uptake in                                            |             | Based on passive uptake in                                            |             |                                                                            | Based on passive uptake in                                            |             | Based on passive uptake in                                            |             |                                                                            | Based on passive uptake in                                            |                 | Based on passive uptake in                                            |             |                 |                |                 |       |       |
|              |                                                                            | MOCK                                                                  | OATP1B1_RIF | MOCK                                                                  | OATP1B1_RIF |                                                                            | MOCK                                                                  | OATP1B1_RIF | MOCK                                                                  | OATP1B1_RIF |                                                                            | MOCK                                                                  | OATP1B1_RIF     | MOCK                                                                  | OATP1B1_RIF | MOCK            | OATP1B1_RIF    |                 |       |       |
| Atorvastatin | 43.2<br>(35.8)                                                             | 2.1<br>(24.2)                                                         | 3.7 (24.2)  | 41.1                                                                  | 39.5        | 76.7<br>(9.5)                                                              | 3.6<br>(17.2)                                                         | 6.6 (29.1)  | 73.1                                                                  | 70.1        | 101.5<br>(26.9)                                                            | 4.3<br>(17.3)                                                         | 9.6 (20.5)      | 97.2                                                                  | 91.9        | 94.9<br>(30.2)  | 7.8<br>(30.4)  | 13.3 (39.5)     | 87.1  | 81.6  |
| Cerivastatin | 39.2<br>(18.3)                                                             | 15.0<br>(22.1)                                                        | 17.5 (22.8) | 24.2                                                                  | 21.7        | 84.5<br>(29.5)                                                             | 40.1<br>(41.9)                                                        | 58.3 (23.4) | 44.4                                                                  | 26.1        | 161.5<br>(26.4)                                                            | 72.5<br>(10.5)                                                        | 100.1<br>(24.2) | 88.9                                                                  | 61.4        | 199.2<br>(34.2) | 121.8<br>(9.4) | 159.8<br>(28.9) | 77.4  | 39.4  |
| Fluvastatin  | 32.1<br>(20.6)                                                             | 8.6<br>(27.7)                                                         | 7.5 (30.1)  | 23.5                                                                  | 24.6        | 95.1<br>(21.2)                                                             | 23.3<br>(6.9)                                                         | 23.2 (18.4) | 71.7                                                                  | 71.9        | 151.8<br>(16.5)                                                            | 43.2<br>(31.4)                                                        | 43.8 (33.6)     | 108.6                                                                 | 108.0       | 224.4<br>(12.9) | 123.5<br>(7.5) | 116.1<br>(47.2) | 100.9 | 108.3 |
| Pitavastatin | 79.2<br>(28.9)                                                             | 3.7<br>(41.6)                                                         | 7.4 (23.0)  | 75.5                                                                  | 71.9        | 264.7<br>(19.9)                                                            | 9.7<br>(33.2)                                                         | 11.4 (7.3)  | 255.0                                                                 | 253.3       | 285.2<br>(17.4)                                                            | 18.9<br>(42.9)                                                        | 26.2 (31.4)     | 266.4                                                                 | 259.1       | 294.7<br>(24.2) | 45.0<br>(29.6) | 39.1 (11.1)     | 249.7 | 255.7 |
| Rosuvastatin | 15.3<br>(40.0)                                                             | 0.15<br>(33.4)                                                        | 0.48 (15.4) | 15.1                                                                  | 14.8        | 15.7<br>(42.9)                                                             | 0.30<br>(40.2)                                                        | 0.58 (2.8)  | 15.4                                                                  | 15.1        | 15.3<br>(16.2)                                                             | 0.57<br>(33.1)                                                        | 0.94 (38.1)     | 14.8                                                                  | 14.4        | 16.3<br>(27.0)  | 1.79<br>(25.9) | 1.62 (31.4)     | 14.5  | 14.7  |

# CL<sub>int,tota</sub> - Apparent total uptake clearance into OATP1B1-expressing HEK293 cells. % CL<sub>int,passive</sub> - Apparent passive uptake clearance into either MOCK or OATP1B1\_RIF HEK293 cells. \*CL<sub>int,OATP1B1</sub> = mean CL<sub>int,tota</sub> - mean CL<sub>int,passive</sub> where the CL<sub>int,passive</sub> measured in the MOCK cells or the OATP1B1\_RIF cells was used. Data shown are mean (CV%) values of three to five independent experiments.
